# Supplementary material for: Structural insights into the competitive inhibition of the ATP-gated P2X receptor channel
Source: PubMed Central journal article supplement (PMC5638823; doi:10.1038/s41467-017-00887-9), 2017-10-12
Supplement: 41467_2017_887_MOESM1_ESM.pdf [file 41467_2017_887_MOESM1_ESM.pdf]

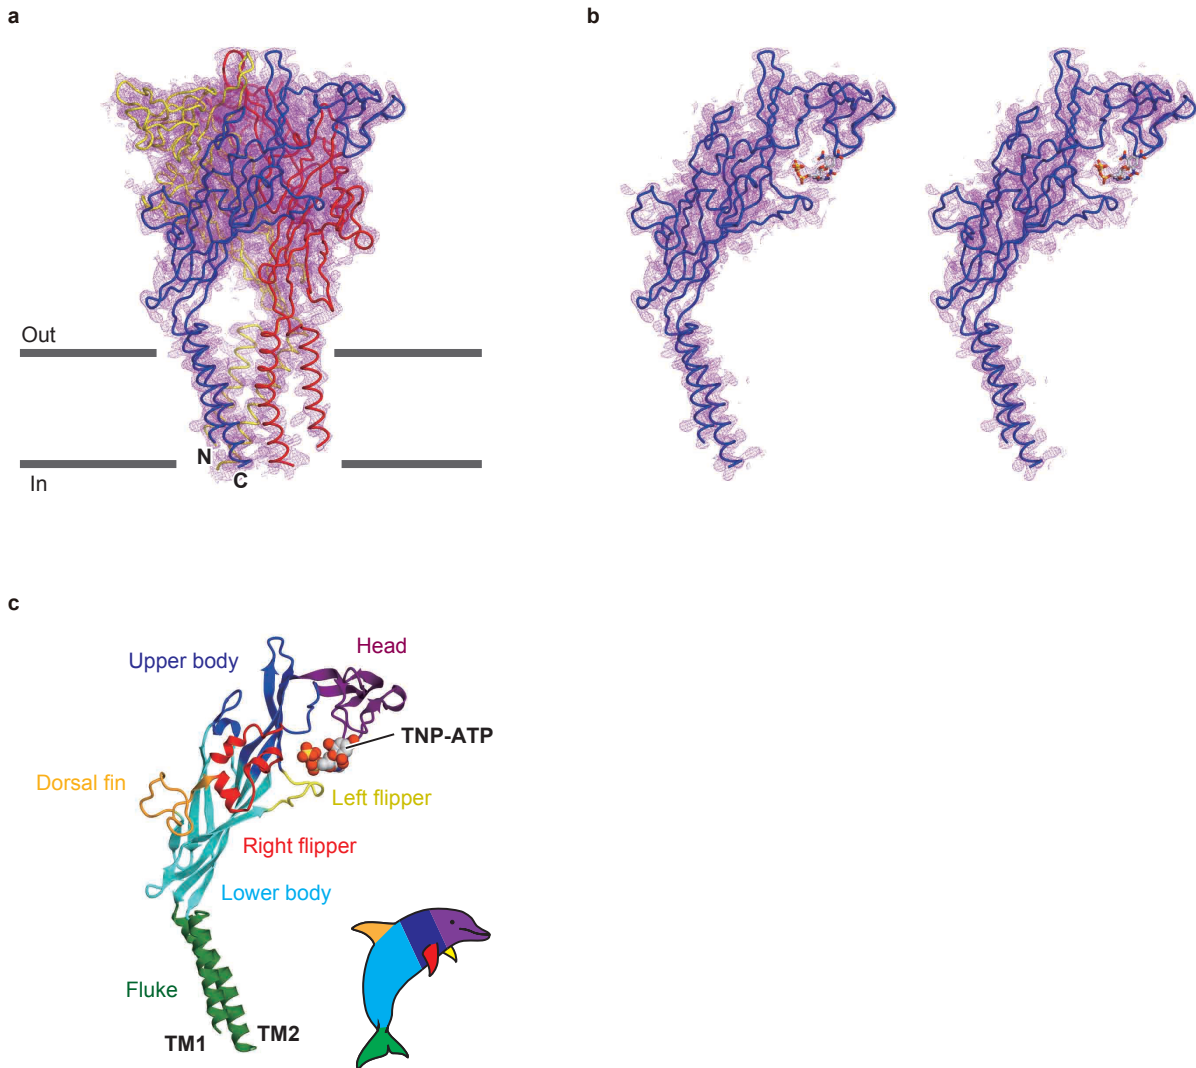

**Supplementary Figure 1 The electron density map and the subunit fold of ckP2X7<sub>cryst</sub>.**

(a) The  $2F_o - F_c$  density map of ckP2X7<sub>cryst</sub>, contoured at  $1 \sigma$ . (b) The stereo view showing  $2F_o - F_c$  density map of the ckP2X7<sub>cryst</sub> subunit, contoured at  $1 \sigma$ . (c) Subunit of the TNP-ATP-bound ckP2X7<sub>cryst</sub>, colored according to the previously proposed dolphin-like model<sup>1</sup>. Based on the sequence alignments, we defined the Fluke (Cys28 - Lys49, and Ser316 - Asn346), Lower body (Arg50 - Val68, Thr81 - Phe91, Phe176 - Asn195, Gly238 - Arg265, and Arg303 - Phe315), Upper body (Ala69 - Tyr80, Val92 - Asn101, Pro157 - Pro164, and Phe277 - Ile302), Head (Gln102 - Cys156), Right flipper (Pro165 - Asp175, and Leu219 - Gly237), Left flipper (Leu266 - Gly276), and Dorsal fin (Ile196 - Arg218) domains of the ckP2X7<sub>cryst</sub>.

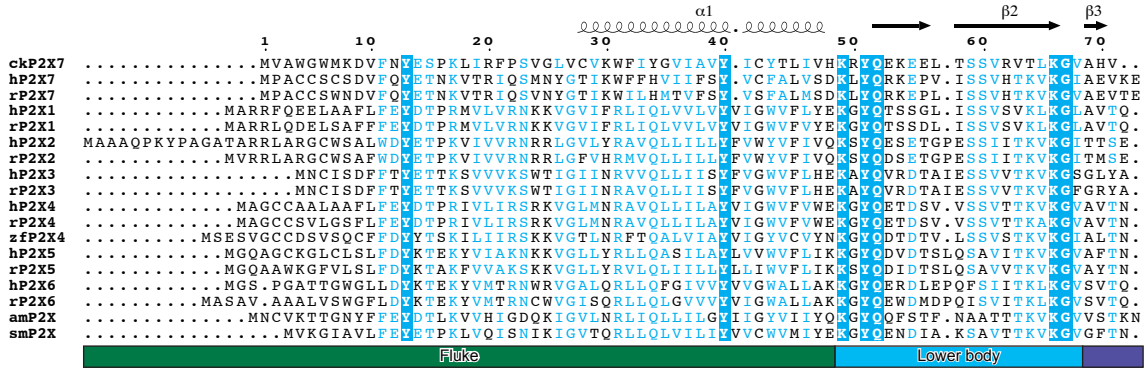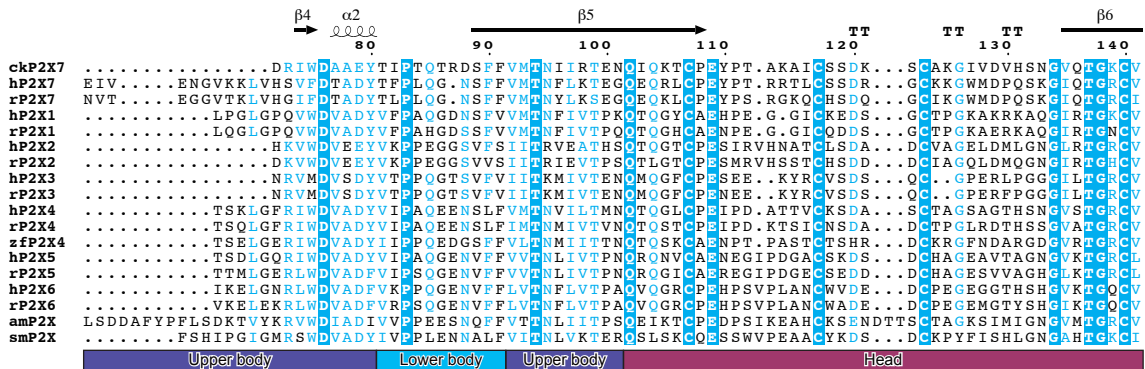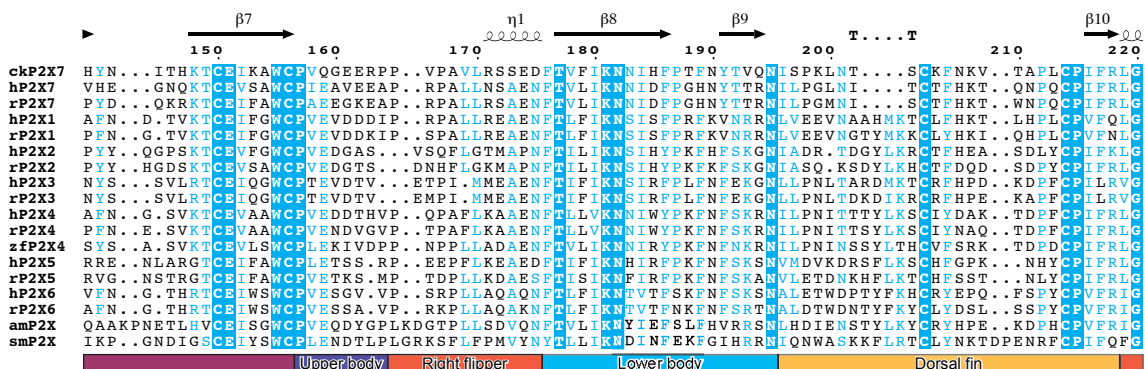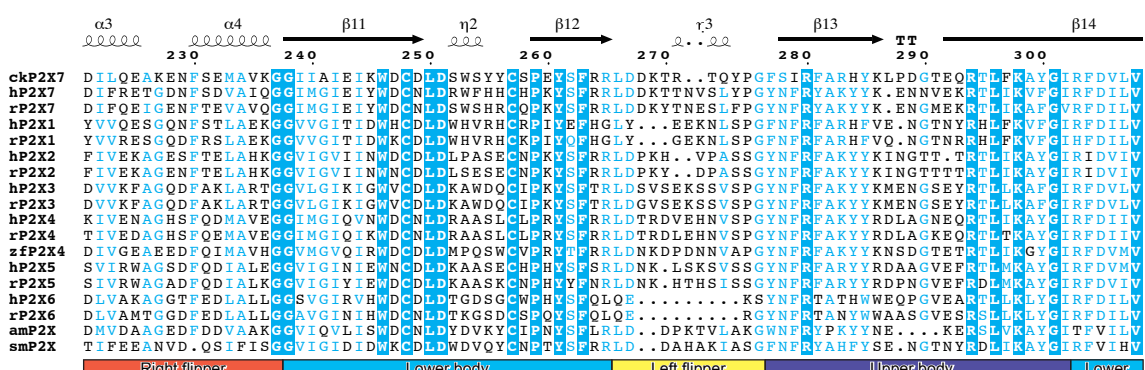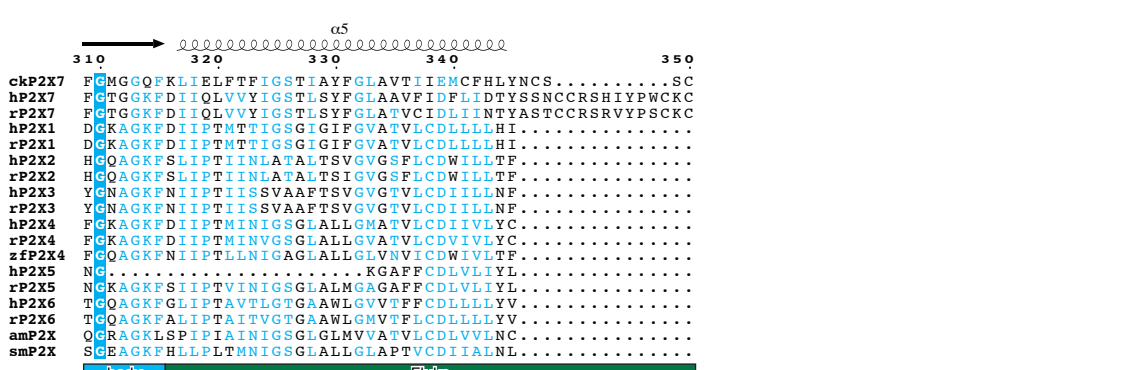

### **Supplementary Figure 2 Sequence alignment of P2X receptors.**

The amino acid sequences of P2X receptors were aligned using Clustal Omega (<https://www.ebi.ac.uk/Tools/msa/clustalo/>), and are shown using ESPript3 (<http://espript.ibcp.fr/ESPript/ESPript/>). Secondary structure elements from the ckP2X7<sub>cryst</sub> are depicted in cartoon representations and are labeled above the alignments, and the colors of the domains based on the dolphin-like model are presented below the alignments. For the sequence alignment, the following vertebrate and invertebrate P2X receptors were used: chicken (ckP2X7, NCBI Accession Number: XP\_001235163), human (hP2X1, NP\_002549; hP2X2, NP\_733782; hP2X3, NP\_002550; hP2X4, Q99571; hP2X5, Q93086; hP2X6, AAF13303; and hP2X7, AAH11913), rat (rP2X1, P47824; rP2X2, NP\_446108; rP2X3, CAA62594; rP2X4, AAC52380; rP2X5, CAA63052; rP2X6, CAA63053; and rP2X7, CAA65131), zebrafish (zfP2X4, AAK00945), Gulf Coast tick (amP2X, AEO34575), and blood fluke (smP2X, CAH04147).

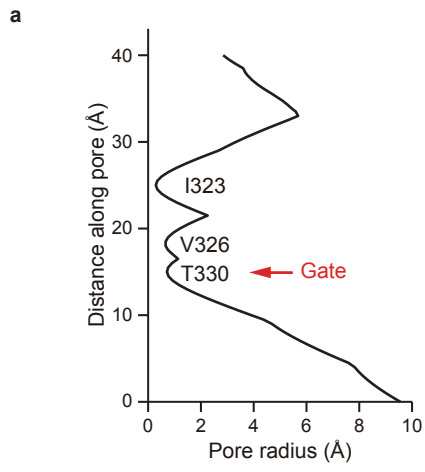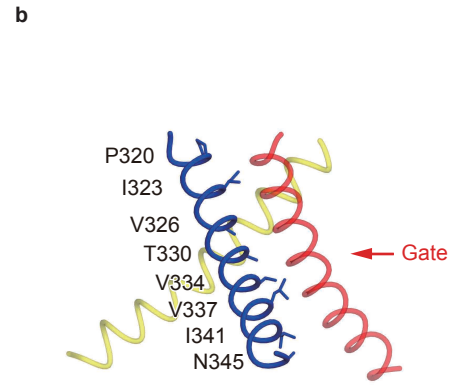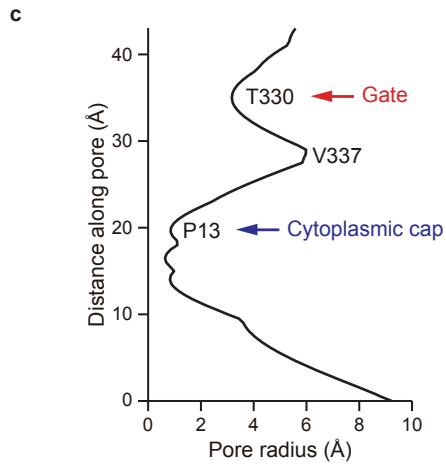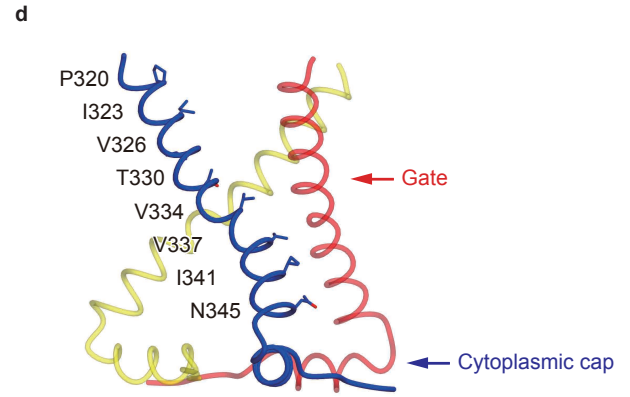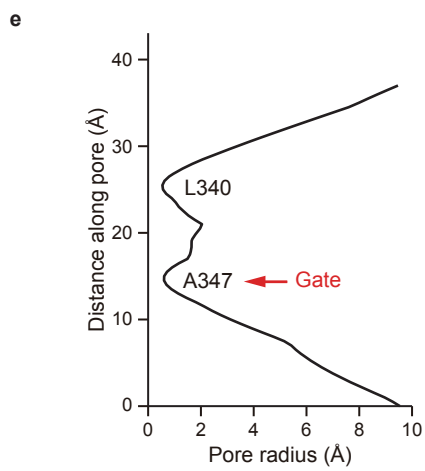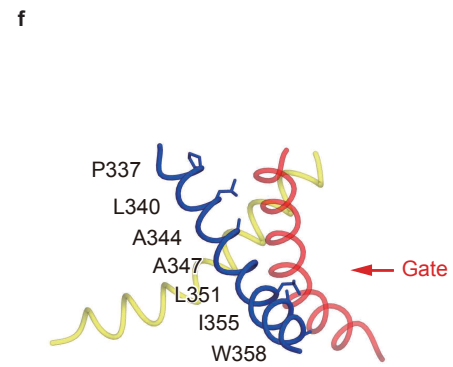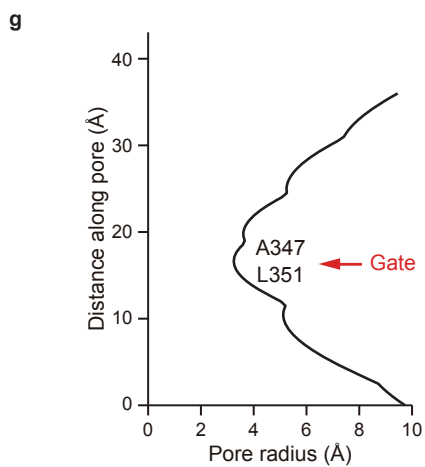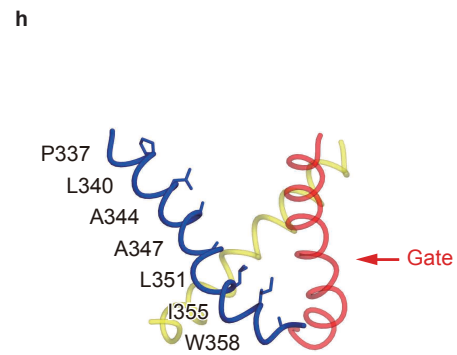

**Supplementary Figure 3 The transmembrane pores of the apo, closed and ATP-bound, open hP2X3 and zP2X4 structures.**

(a) The pore radius for the apo, closed hP2X3 structure (PDB ID: 5SVJ) along the pore center axis. (b) Pore-lining residues of the apo, closed hP2X3 structure are depicted by stick models. (c) The pore radius for the ATP-bound, open hP2X3 structure (PDB ID: 5SVK) along the pore center axis. (d) Pore-lining residues of the ATP-bound, open hP2X3 structure are depicted by stick models. (e) The pore radius for the apo, closed zP2X4 structure (PDB ID: 4DW0) along the pore center axis. (f) Pore-lining residues of the apo, closed zP2X4 structure are depicted by stick models. (g) The pore radius for the ATP-bound, open zP2X4 structure (PDB ID: 4DW1) along the pore center axis. (h) Pore-lining residues of the ATP-bound, open zP2X4 structure are depicted by stick models. The pore size was calculated by the program HOLE.

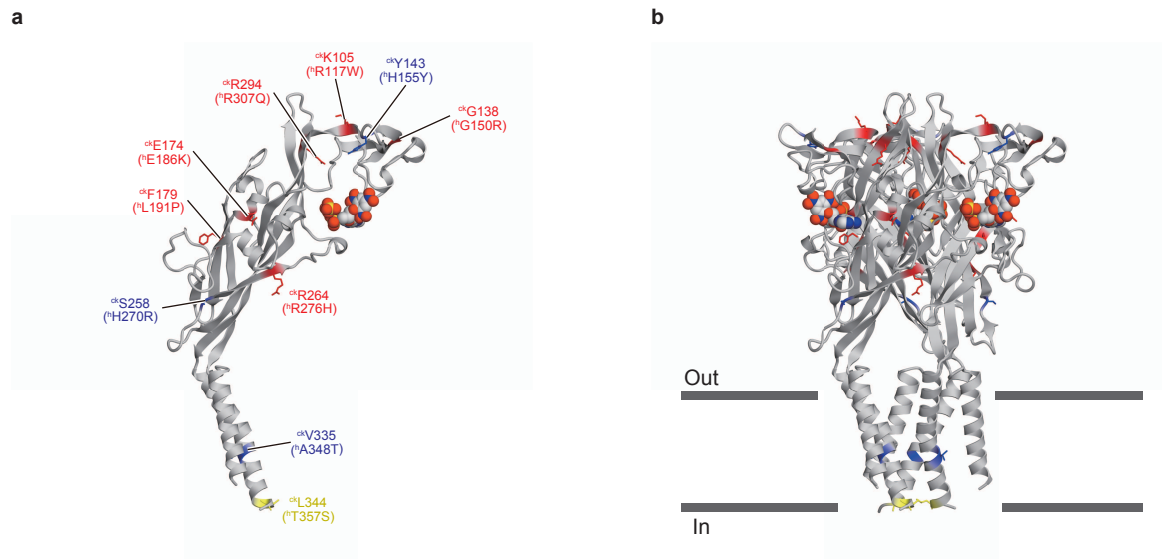

**c**

| dsSNP ID   | Amino acid change<br>in hP2X7 | Corresponding residue<br>in ckP2X7 | Effect on<br>function | Related disease                                                                                  |
|------------|-------------------------------|------------------------------------|-----------------------|--------------------------------------------------------------------------------------------------|
| rs17525809 | <sup>h</sup> V76A             | -                                  | Partial loss          | Mood disorder                                                                                    |
| rs28360445 | <sup>h</sup> R117W            | <sup>ck</sup> K105                 | Loss                  | Mood disorder                                                                                    |
| rs28360447 | <sup>h</sup> G150R            | <sup>ck</sup> G138                 | Loss                  | Accelerated Lumbar Spine Bone Loss                                                               |
| rs208294   | <sup>h</sup> H155Y            | <sup>ck</sup> Y143                 | Gain                  | Crohn's disease, Papillary thyroid cancer,<br>Bipolar or unipolar disorder                       |
| rs28360451 | <sup>h</sup> E186K            | <sup>ck</sup> E174                 | Loss                  |                                                                                                  |
| rs28360452 | <sup>h</sup> L191P            | <sup>ck</sup> F179                 | Loss                  | Mood disorder                                                                                    |
| rs7958311  | <sup>h</sup> H270R            | <sup>ck</sup> S258                 | Gain                  |                                                                                                  |
| rs7958316  | <sup>h</sup> R276H            | <sup>ck</sup> R264                 | Loss                  |                                                                                                  |
| rs28360457 | <sup>h</sup> R307Q            | <sup>ck</sup> R294                 | Loss                  | Accelerated Lumbar Spine Bone Loss, Fracture risk,<br>Periprosthetic osteolysis, Crohn's disease |
| rs1718119  | <sup>h</sup> A348T            | <sup>ck</sup> V335                 | Gain                  | Toxoplasmosis, Anxiety,<br>Bipolar or unipolar disorder                                          |
| rs2230911  | <sup>h</sup> T357S            | <sup>ck</sup> L344                 | Partial loss          | Mood disorder                                                                                    |

**Supplementary Figure 4 The locations of amino acid residues substituted by SNPs in the hP2X7 receptor.**

(a,b) The amino acid residues in the hP2X7 receptor that are substituted by SNPs and involved in losses or gains of functions are mapped on the single subunit (a) or the trimer (b) of the ckP2X7<sub>cryst</sub> structure. The substituted amino acid residues are depicted by stick models. Red, yellow and blue colors indicate loss of function, partial loss of function and gain of function, respectively. (c) The relationship between the amino acid residues substituted by SNPs in the hP2X7 receptor and ckP2X7<sub>cryst</sub>. The table was created based on Sluyter and Stokes, 2011 (ref. 2) and Roger *et al.*, 2010 (ref. 3). The superscripts “ck” and “h” refer to the chicken and human P2X7 receptors.

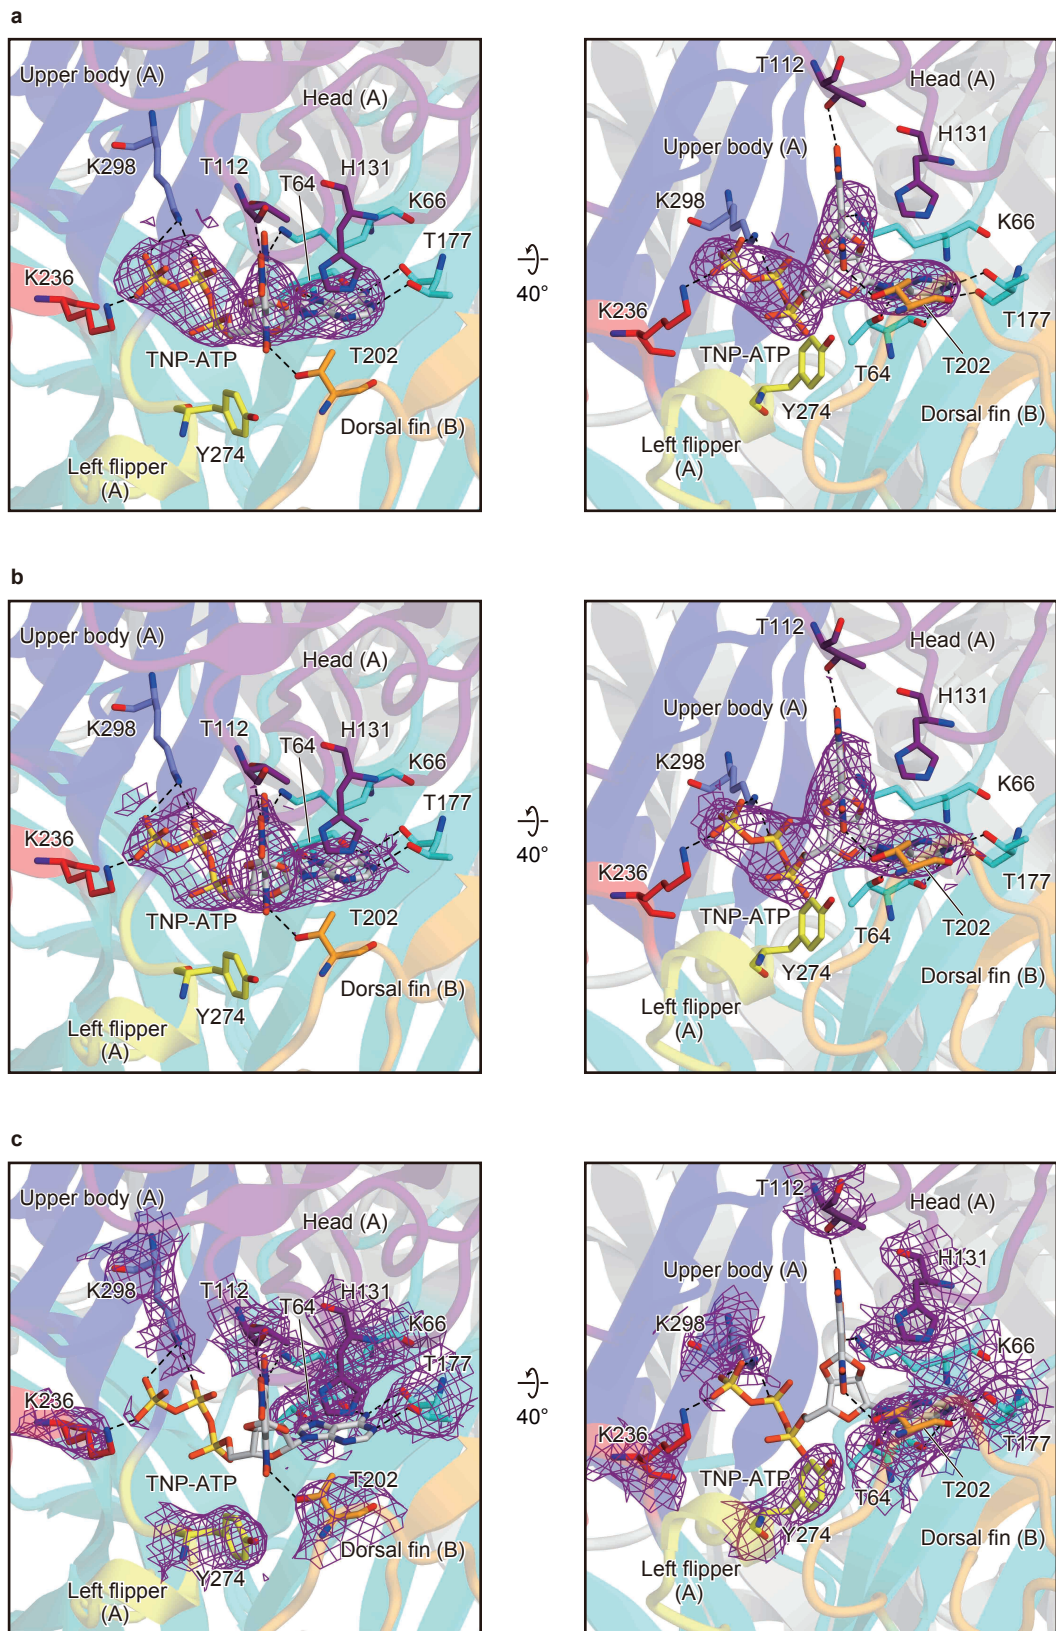

**Supplementary Figure 5 Density of TNP-ATP and surrounding residues in the TNP-ATP binding site.**

(a,b) The  $F_o - F_c$  density map contoured at  $2.5 \sigma$  (a) and the  $2F_o - F_c$  density map contoured at  $1 \sigma$  (b), showing the TNP-ATP. (c) The  $2F_o - F_c$  density map contoured at  $1 \sigma$ , showing the residues involved in TNP-ATP binding. The TNP-ATP molecule and the residues involved in TNP-ATP binding are depicted by stick models.

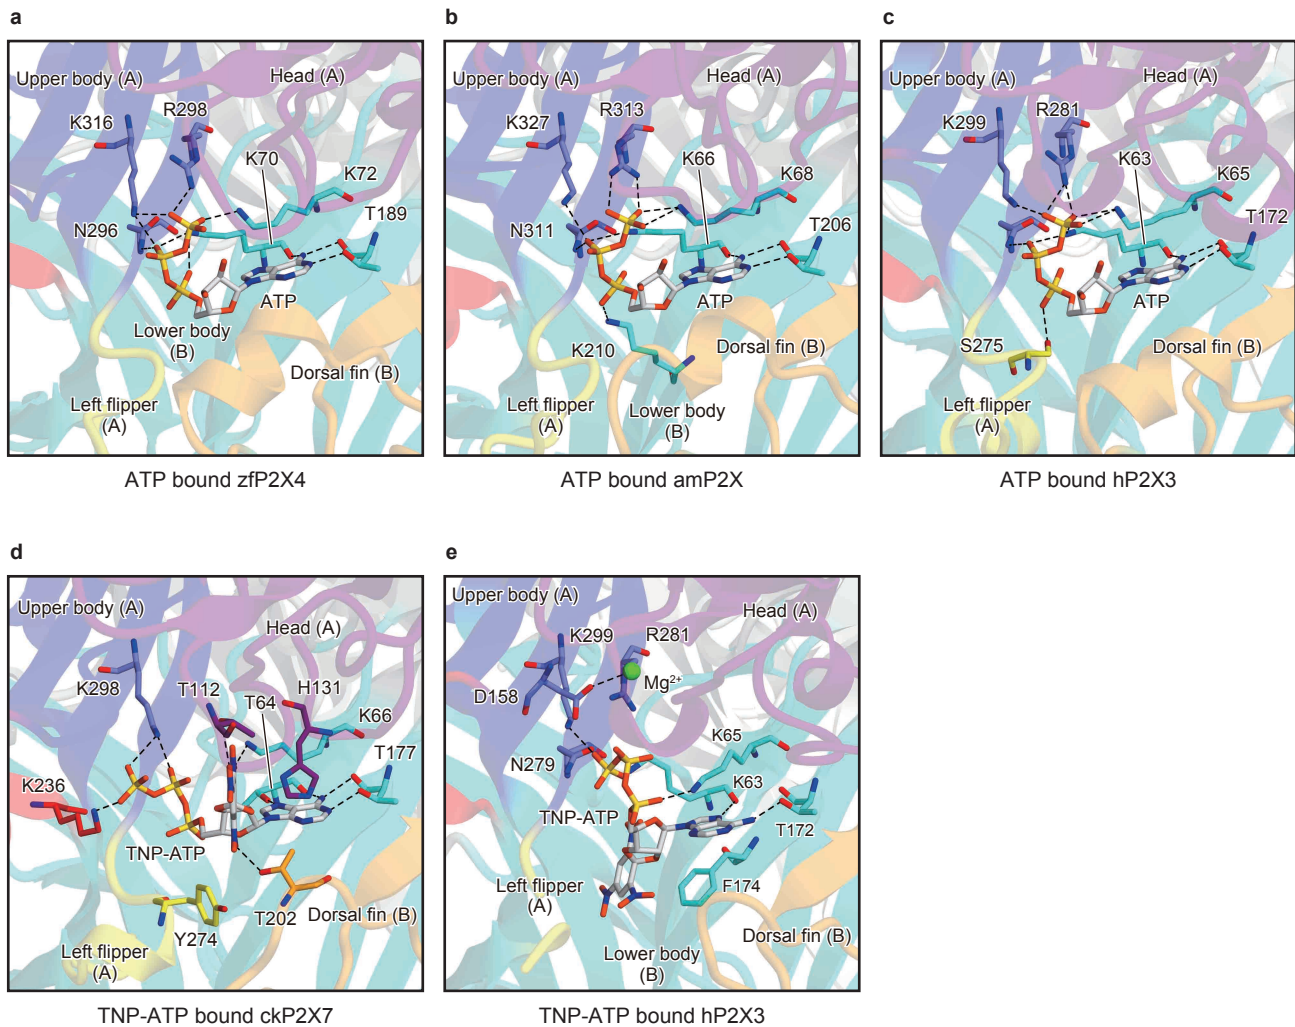

**Supplementary Figure 6 Comparison of ATP and TNP-ATP binding sites.**

(a-c) Close-up views of the ATP binding sites in the ATP-bound zfP2X4 structure (PDB ID: 4DW1) (a), the ATP-bound amP2X structure (PDB ID: 5F1C) (b) and the ATP-bound hP2X3 structure (PDB ID: 5SVK) (c). (d,e) Close-up views of the TNP-ATP binding site in the TNP-ATP-bound ckP2X7 structure (d) and the TNP-ATP-bound hP2X3 structure (PDB ID: 5SVQ) (e). The amino acid residues, ATP and TNP-ATP are depicted by stick models. The molecule is colored according to the dolphin-like model. Dotted black lines indicate hydrogen bonds ( $<3.3 \text{ \AA}$ ).



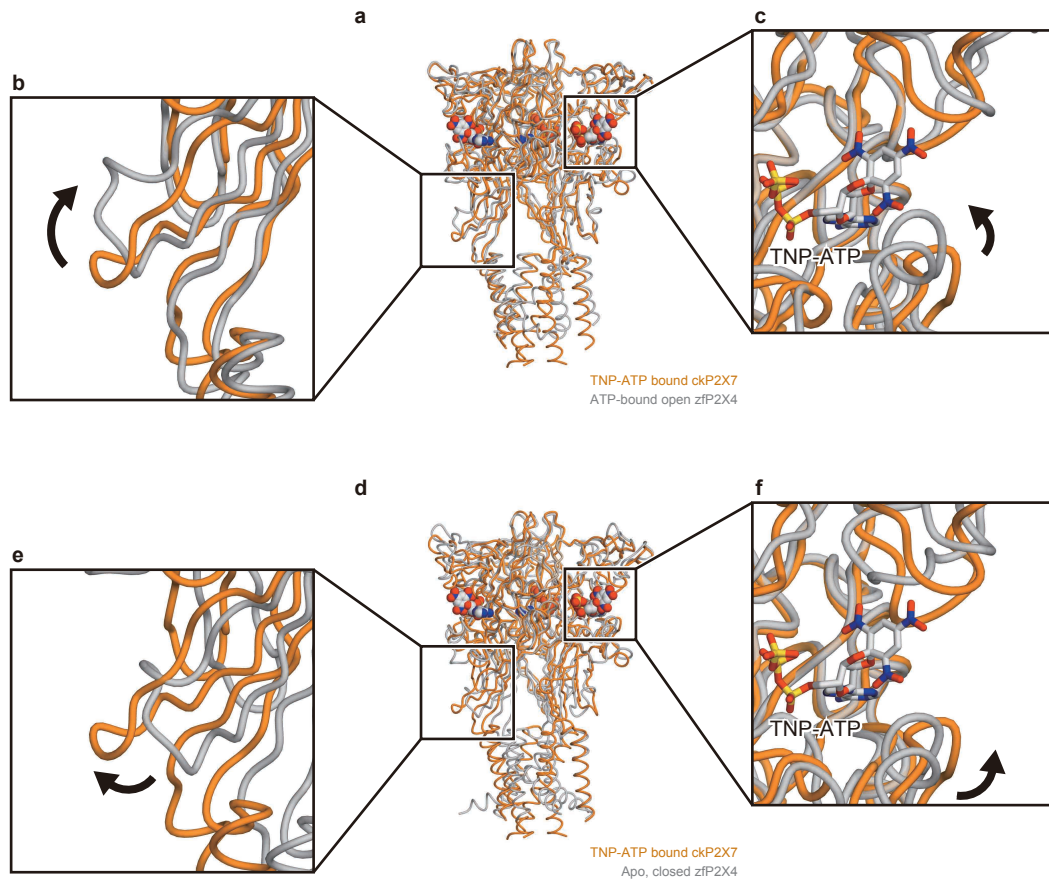

**Supplementary Figure 7 Comparison of the overall structures of the apo closed, and TNP-ATP-bound and ATP-bound, open states for ckP2X7 and zfp2X4.**

(a-e) Subunit comparisons of the TNP-ATP bound ckP2X7 (orange) and ATP-bound, open zfp2X4 (gray, PDB ID: 4DW1) structures. Close-up views of the lower body domain (b) and the TNP-ATP binding site in ckP2X7 (c) are shown in each box. The black arrows denote the movement from the TNP-ATP-bound state to the ATP-bound open state. (d-f) Subunit comparisons of the TNP-ATP-bound ckP2X7 (orange) and apo, closed zfp2X4 (gray, PDB ID: 4DW0) structures. Close-up views of the lower body domain (e) and the TNP-ATP binding site in ckP2X7 (f) are shown in each box. The black arrows denote the movement from the apo, closed state to the TNP-ATP-bound state.

**a**

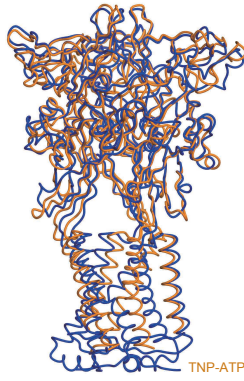

**b**

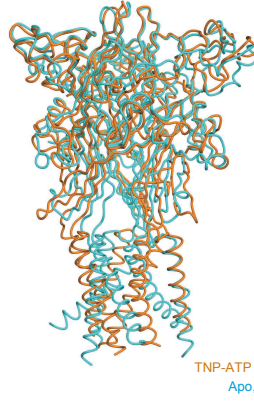

**c**

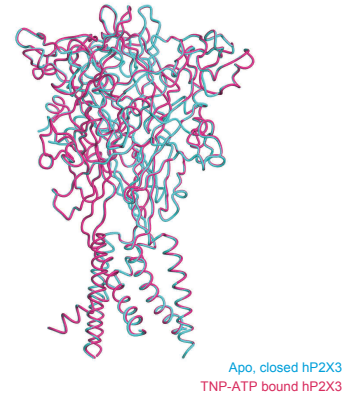

**d**

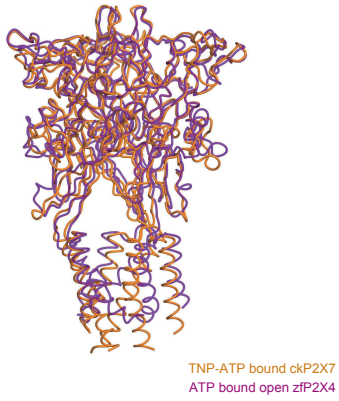

**e**

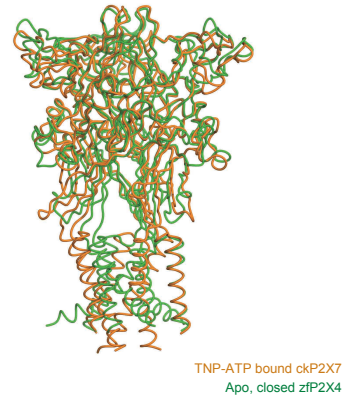

**f**

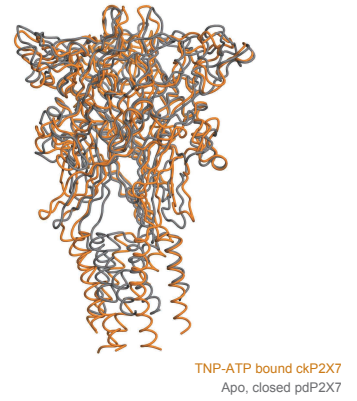

**g**

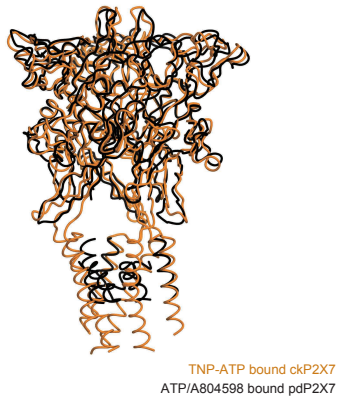

**h**

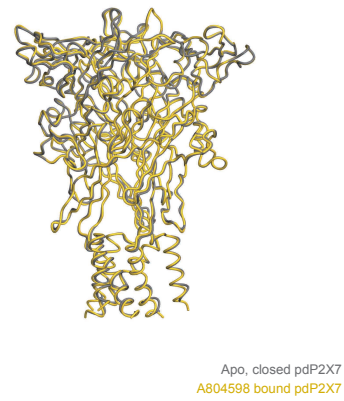

**Supplementary Figure 8 Comparison of the overall structures for ckP2X7, hp2X3, zfP2X4 and pdP2X7.**

(a) The superimposition of the TNP-ATP-bound ckP2X7 (orange) and ATP-bound, open hp2X3 (blue, PDB ID: 5SVK) structures. The RMSD value is 1.87 Å for 856 C $\alpha$  atoms between trimers. (b) The superimposition of the TNP-ATP-bound ckP2X7 (orange) and apo, closed hp2X3 (cyan, PDB ID: 5SVJ) structures. The RMSD value is 2.31 Å for 758 C $\alpha$  atoms between trimers. (c) The superimposition of the apo, closed hp2X3 (cyan) and TNP-ATP-bound hp2X3 (pink, PDB ID: 5SVQ) structures. The RMSD value is 0.22 Å for 954 C $\alpha$  atoms between trimers. (d) The superimposition of the TNP-ATP-bound ckP2X7 (orange) and ATP-bound, open zfP2X4 (purple, PDB ID: 4DW1) structures. The RMSD value is 1.95 Å for 836 C $\alpha$  atoms between trimers. (e) The superimposition of the TNP-ATP-bound ckP2X7 (orange) and apo, closed zfP2X4 (green, PDB ID: 4DW0) structures. The RMSD value is 2.35 Å for 814 C $\alpha$  atoms between trimers. (f) The superimposition of the TNP-ATP-bound ckP2X7 (orange) and ATP/antagonist (A804598) bound pdP2X7 (black, PDB ID: 5U2H) structures. The RMSD value is 1.73 Å for 790 C $\alpha$  atoms between trimers. (g) The superimposition of the TNP-ATP-bound ckP2X7 (orange) and apo, closed pdP2X7 (gray, PDB ID: 5U1L) structures. The RMSD value is 2.18 Å for 787 C $\alpha$  atoms between trimers. (h) The superimposition of the apo, closed pdP2X7 (gray) and A804598-bound pdP2X7 (gold, PDB ID: 5U1V) structures. The RMSD value is 0.45 Å for 949 C $\alpha$  atoms between trimers.

**Supplementary Table 1 The nucleotide sequences of the synthesized ckP2X7 WT and the crystallization construct ckP2X7<sub>cryst</sub> used in this study.**

|                             |                                                                                                                                                                                                                                                                                                                                                                                                                                                                                                                                                                                                                                                                                                                                                                                                                                                                                                                                                                                                                                                                                                                                                                                                                                                                                                                                                                                                                                                                                                                                                                                                                                                                                                                                                                                                                                                                                             |
|-----------------------------|---------------------------------------------------------------------------------------------------------------------------------------------------------------------------------------------------------------------------------------------------------------------------------------------------------------------------------------------------------------------------------------------------------------------------------------------------------------------------------------------------------------------------------------------------------------------------------------------------------------------------------------------------------------------------------------------------------------------------------------------------------------------------------------------------------------------------------------------------------------------------------------------------------------------------------------------------------------------------------------------------------------------------------------------------------------------------------------------------------------------------------------------------------------------------------------------------------------------------------------------------------------------------------------------------------------------------------------------------------------------------------------------------------------------------------------------------------------------------------------------------------------------------------------------------------------------------------------------------------------------------------------------------------------------------------------------------------------------------------------------------------------------------------------------------------------------------------------------------------------------------------------------|
| ckP2X7 WT seq               | <p>ATGGAATTCGTGGCTTGGGGCTGGATGAAGGACGTGTTCAACTACGAGTCCCCAAGCTGATCCGGTTCCC<br/> CTCTGTGGGACTCGTGTGCGTGAAGTGGTTCATCTACGGCGTGATCGCCGTGTACATCTGCTACACCCTGA<br/> TCGTGCACAAGCGCTACCAGGAAAAAGAGGAAGTACCAGCTCCGTGAGAGTACCCTGAAGGGCGTGGC<br/> CCACGTGGACAGAATTTGGGACGCCGCCGAGTACACCATCCCCACCCAGACCAGAGACAGCTTCTTCGTG<br/> ATGACCAACATCATCCGGACCGAGAACAGATCCAGAAAACCTGCCCGAGTACCCACCCGCAAGGCCA<br/> TCTGCAGCAGCGATAAGAGCTGCGCCAAGGGCATCGTGGACGTGCACAGCAATGGCGTGCAGACCGGGAA<br/> GTGCGTGCACACTACAACATCACCCACAAGACCTGCGAGATCAAGGCTGGTGCCTGTGCAGGGCGAAGAA<br/> AGACCTCTGTGCCCGCCGTGCTGAGAAGCAGCGAGGACTTACCGTGTTCATCAAGAACAACATCCACTT<br/> CCCCACCTTCAACTACACCGTGCAGAACATCAGCCCTAAGCTGAACACCAGCTGCAAGTTCAACAAAGTG<br/> ACCGCCCCACTGTGCCCATCTTCCGGCTGGGAGACATTCTGCAGGAAGCCAAAGAAAATTTCAGCGAGA<br/> TGGCCGTGAAGGGCGGCATCATTGCCATCGAGATTAAGTGGGACTGCGACCTGGACAGCTGGTCTACTA<br/> CTGCAGCCCTGAGTACAGCTTCCGGCGGCTGGACGACAAGACCAGAACCAGTACCCCGGCTTCAGCATC<br/> AGATTCGCCCCGGCACTACAAGCTGCCCGACGGCACCGAACAGCGGACCCTGTTTAAAGCCTACGGCATT<br/> GATTTCGACGTGCTGTTGTTGGCATGGGCGGCCAGTTAAGCTGATCGAGCTGTTCACCTTCATCGGCAGC<br/> ACAATCGCCTACTTCGGCCTGGCCGTGACCATCATCGAGATGTGCTTCCACCTGTACAACCTGCAGCTCCTG<br/> CTGCAAGATCCAAGTGTGCGAGAACGTGATCCGGAAGAAATACGAGACAGTGTGATGCCCCGAACAAGTG<br/> ATCCTGGTGTCTACGTGGACAAGCCCCACATCACACTGATCAAGATGCCCTGCGGACCAGCCTGCAGAA<br/> CGCCGAGGGCAGCATCTTCGAGGACCACCCCGTGAAGTCTTACGACCCCGGACCTGCTGCAGCCACAAG<br/> AGCAACGAGAAACACGGCGCTGCCAGAGCGAGCTGAGGCTCTGACACAGAGCAGCAGCTCCACCAACT<br/> GCCCAAGTGGTGCTGCTGCGGCAGATGCCAGGTGGCCAGAAGACCACGAGCAGCTGTGCTGCAGAAA<br/> GAAAGAGGGCCAGTGCATCACCCACCTATTGGTTCCGCCAGCTGGTGTGAGCCGGGACACACTGAAC<br/> AAGCCCTGCTGTACGAGGACCCCTTCTGGATCTGACCGCCACAGCAGCAACAGCCAGCTGAGAAGGA<br/> TCGCCTACAAGCAGTACATCCATTGGAGATTCGGCAGCTTCGAGCTGGAAGATCGGGCCATCATCCCCAGC<br/> TGCTGTGCGGCGGTGATCAGATCCACCTACCCCAAAGAGAACGGCAATTACACCGCTTCAACCTGGAAC<br/> CGAGTAA</p> |
| ckP2X7 <sub>cryst</sub> seq | <p>ATGTGCGTGAAGTGGTTCATCTACGGCGTGATCGCCGTGTACATCTGCTACACCCTGATCGTGCACAAGCG<br/> CTACCAGGAAAAAGAGGAAGTACCAGCTCCGTGAGAGTACCCTGAAGGGCGTGGCCACGTGGACAG<br/> AATTTGGGACGCCGCCGAGTACACCATCCCCACCCAGACCAGAGACAGCTTCTTCGTGATGACCAACATCA<br/> TCCGGACCGAGAACCAGATCCAGAAAACCTGCCCGAGTACCCACCCGCAAGGCCATCTGCAGCAGCGA<br/> TAAGAGCTGCGCCAAGGGCATCGTGGACGTGCACAGCAATGGCGTGCAGACCCGGAAGTGGTGCACACTAC<br/> AACATCACCCACAAGACCTGCGAGATCAAGGCTGGTGCCTGTGCAGGGCGAAGAAAGACCTCTGTGC<br/> CCGCCGTGCTGAGAAGCAGCGAGGACTTACCGTGTTCATCAAGAACAACATCCACTTCCCCACCTTCCAG<br/> TACACCGTGCAGAACATCAGCCCTAAGCTGAACACCAGCTGCAAGTTCAACAAAGTACCAGCCCCACTGT<br/> GCCCATCTTCCGGCTGGGAGACATTCTGCAGGAAGCCAAAGAAAATTTCAGCGAGATGGCCGTGAAGGG<br/> CGGCATCATTGCCATCGAGATTAAGTGGGACTGCGACCTGGACAGCTGGTCTACTACTGCAGCCCTGAGT<br/> ACAGCTTCCGGCGGCTGGACGACAAGACCAGAACCAGTACCCCGGCTTCAGCATCAGATTCGCCCGGCA<br/> CTACAAGCTGCCGACGGCACCGAACAGCGGACCCTGTTTAAAGCCTACGGCATTAGATTTCAGCTGCTG<br/> GTGTTTGGCATGGGCGGCCAGTTTAAAGCTGATCGAGCTGTTCACCTTCATCGGCAGCACAATCGCCTACTT<br/> CGGCTGGCCGTGACCATCATCGAGATGTGCTTCCACCTGTACAACCTCGAGTAA</p>                                                                                                                                                                                                                                                                                                                                                                                                                                                                                                                                                                                                                                                                                                                                                                                                          |

**Supplementary Information References**

1. Kawate, T., Michel, J. C., Birdsong, W. T. & Gouaux, E. Crystal structure of the ATP-gated P2X(4) ion channel in the closed state. *Nature* **460**, 592–598 (2009).
2. Sluyter, R. & Stokes, L. Significance of P2X7 receptor variants to human health and disease. *Recent Pat. DNA Gene Seq.* **5**, 41–54 (2011).
3. Roger, S. *et al.* Single nucleotide polymorphisms that were identified in affective mood disorders affect ATP-activated P2X7 receptor functions. *J. Psychiatr. Res.* **44**, 347–355 (2010).
